# Supplementary material
Source: PubMed Central journal article supplement (PMC10482169)
Supplement: NIHMS1922395-supplement-ct-2021-00359e_SI.pdf [file NIHMS1922395-supplement-ct-2021-00359e_SI.pdf]

1 **The computational study on the function of palmitoylation on the envelope protein in**  
2 **SARS-CoV-2**

3  
4 Shengjie Sun<sup>1</sup>, Chitra Karki<sup>1</sup>, Javier Aguilera<sup>2</sup>, Alan E Lopez Hernandez<sup>1</sup>, Jianjun Sun<sup>2</sup>, Lin  
5 Li<sup>1,3,\*</sup>

6  
7  
8  
9  
10 Correspondence to: Lin Li (E-mail: [lli5@utep.edu](mailto:lli5@utep.edu))

11 <sup>1</sup> Computational Science Program, University of Texas at El Paso, 500 W University Ave, TX, 79968,  
12 USA;

13 <sup>2</sup> Department of Biological Sciences and Border Biomedical Research Center, University of Texas at El  
14 Paso, 500 W University Ave, TX, 79968, USA;

15 <sup>3</sup> Department of Physics, University of Texas at El Paso, 500 W University Ave, TX, 79968, USA;

16 *\*To whom correspondence should be addressed.*

17

### E protein pentamers

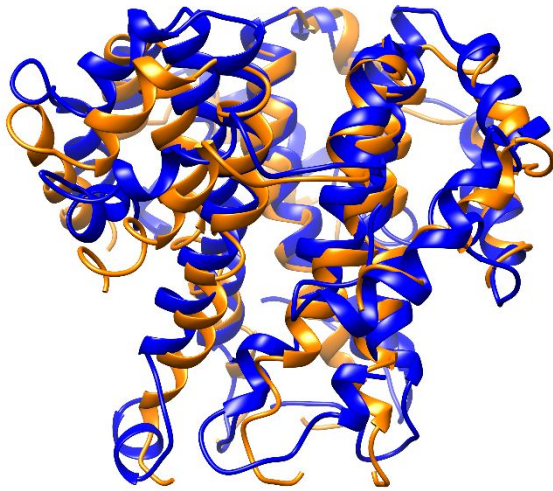

### E protein monomer

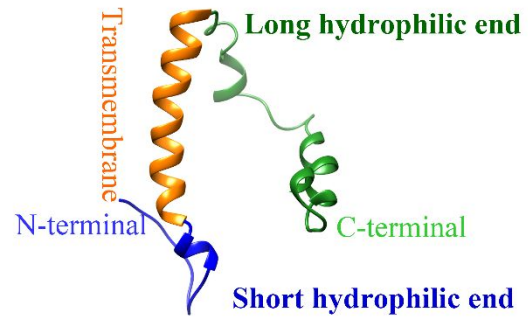

|                                  |                                                                                                                   |                                                    |                                |
|----------------------------------|-------------------------------------------------------------------------------------------------------------------|----------------------------------------------------|--------------------------------|
| <p>SARS-CoV2</p> <p>SARS-CoV</p> | <p>MYSFVSEETGLIVNSVLLFLAFVVFLLVTLAILTALRLCAYCCNIVNVS</p> <p>MYSFVSEETGLIVNSVLLFLAFVVFLLVTLAILTALRLCAYCCNIVNVS</p> | <p>VKPSFYVYSRVKLNLSR</p> <p>VKPTVYVYSRVKLNLSSE</p> | <p>VPDLLV</p> <p>EGVPDLLVL</p> |
|                                  | <p>Short hydrophilic end</p> <p>Transmembrane</p>                                                                 |                                                    | <p>Long hydrophilic end</p>    |

18  
19  
20

Figure S1: The structure alignment and the sequence alignment of SARS-CoV2 and SARS-CoV. The long and short hydrophilic ends are represented in blue and green in an E protein monomer.

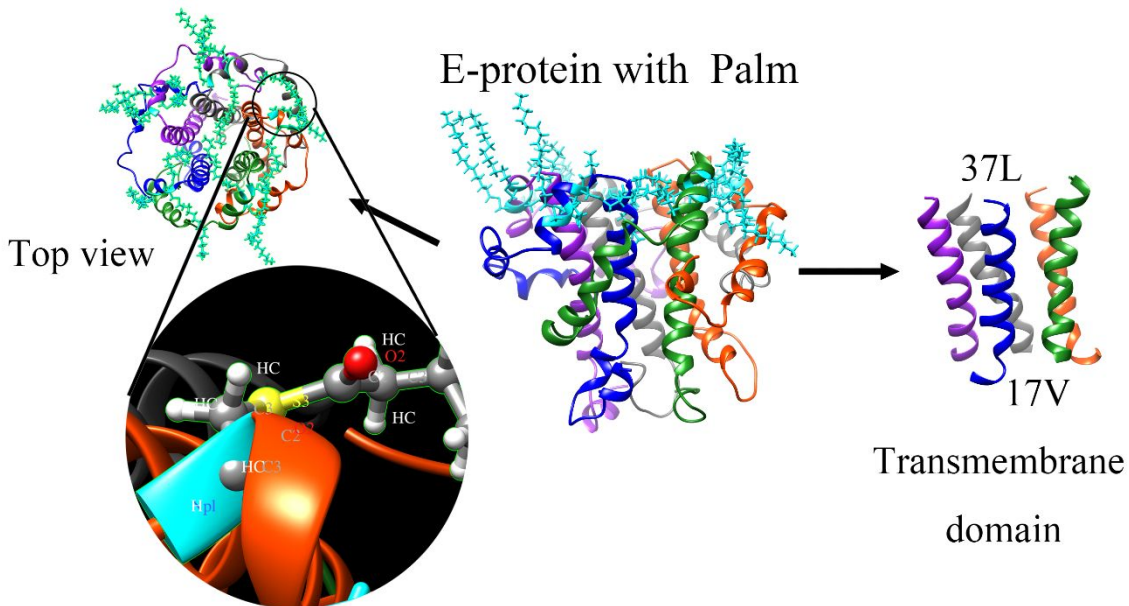

21  
22

Figure S2: The atomic representation of palmitoylation and the transmembrane domain of E-protein.

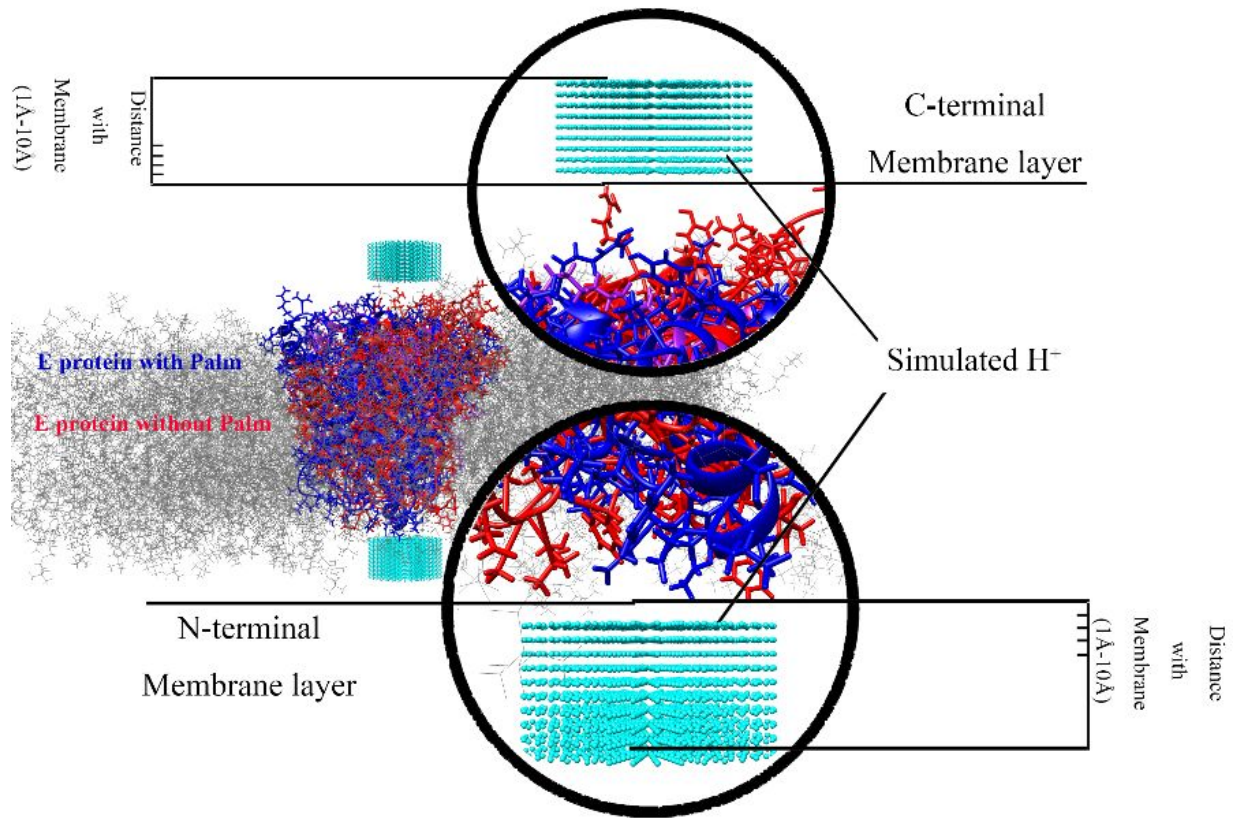

23

24 Figure S3: The diagram of the placement of simulated  $H^+$  ions for electrostatic force testing.

25

## The RMSD of E-protein with and without Palm in transmembrane domain

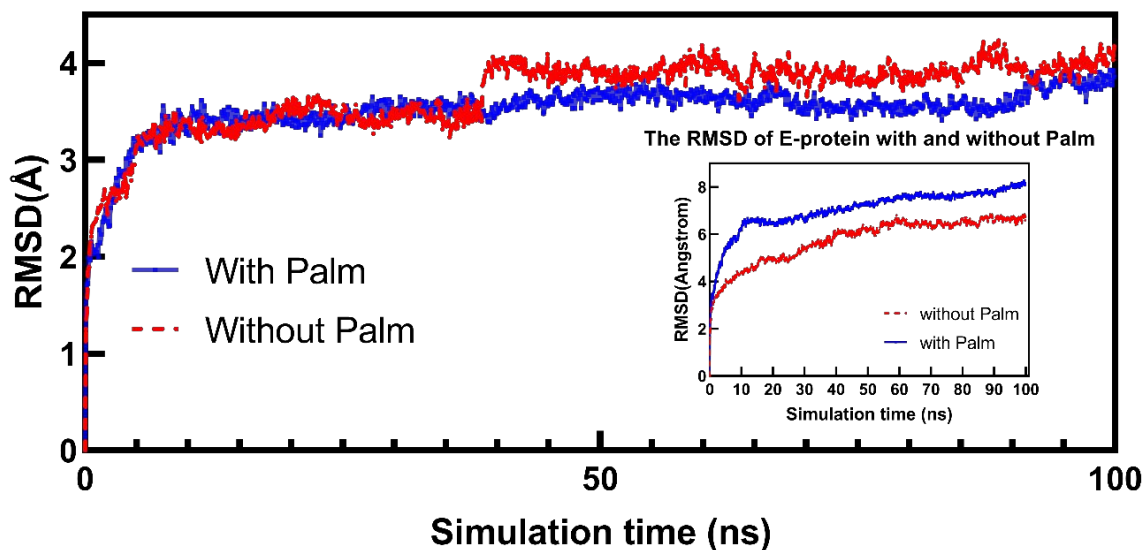

26  
27 Figure S4: The backbone RMSD of E-protein pentamer with and without Palm during 100 ns simulation  
28

## The RMSD of E-protein with and without Palm in transmembrane domain for triple simulations

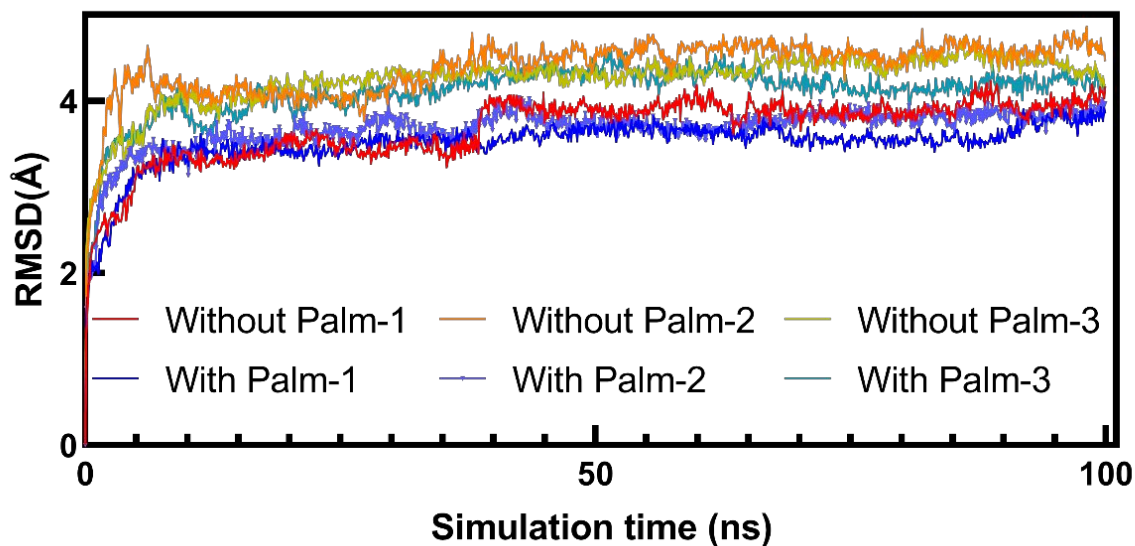

29  
30 Figure S5: The backbone RMSD of E-protein pentamer with and without Palm during 100 ns for triple  
31 simulations

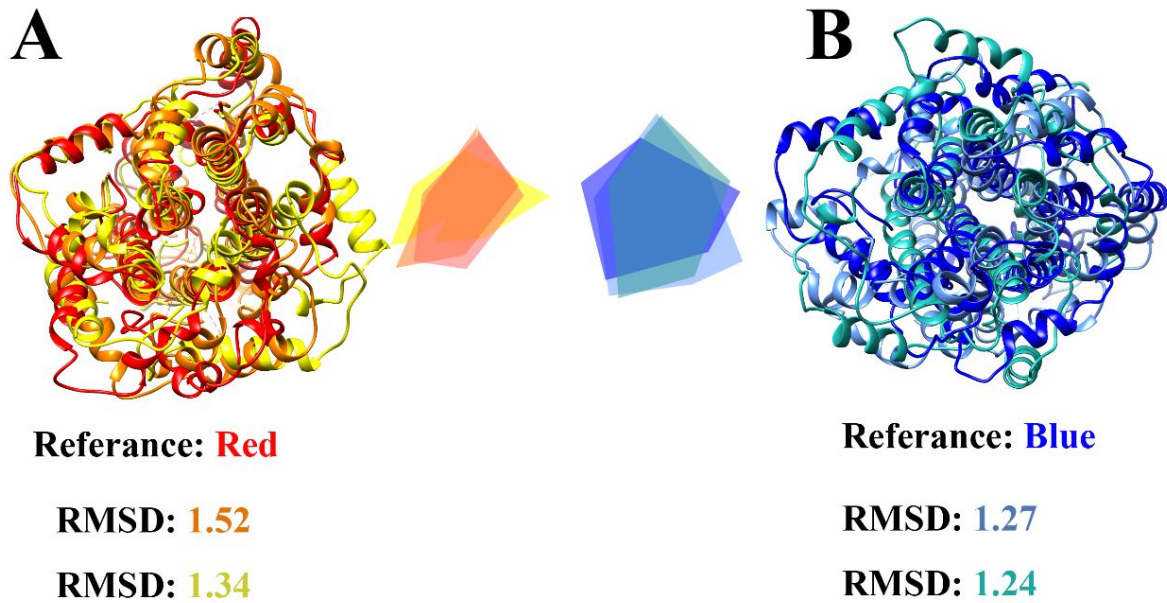

33

34 Figure S6: The structural comparison of E-protein pentamer without (A) and with (B) Palm in triple  
 35 simulations where the RMSD calculation is based on the first simulations (red and blue). The shadows are  
 36 the general comparison on pores

37

### Minimal radius of the pore on the C-terminal of TMD

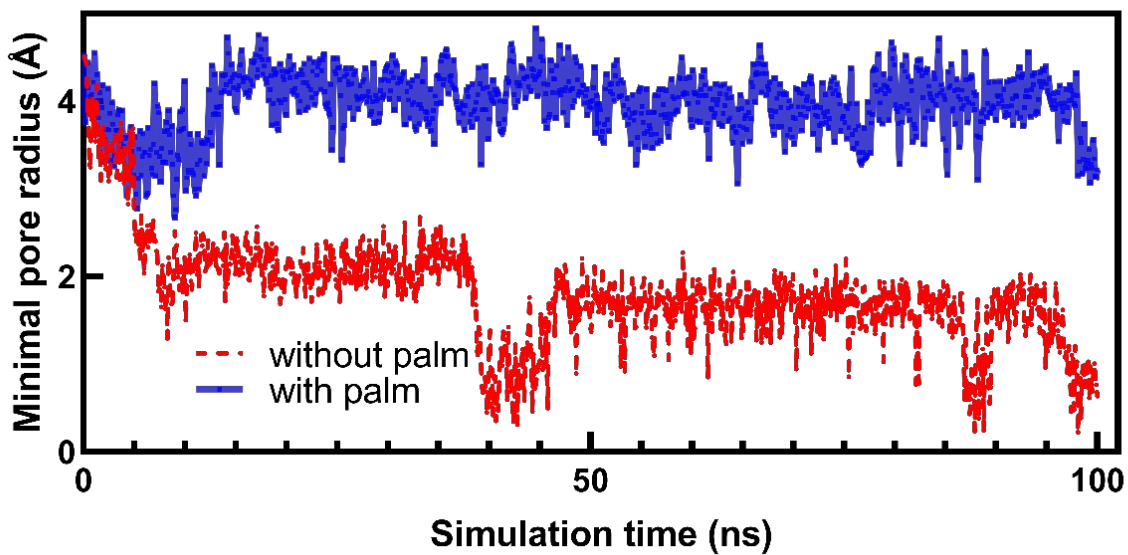

38

39 Figure S7: The minimal pore radius of the E-protein pentamer in C-terminal (residue 30-39) of TMD  
 40 during the whole simulation (by an average of 3 testings)

### The volume of the pore on the C-terminal of TMD

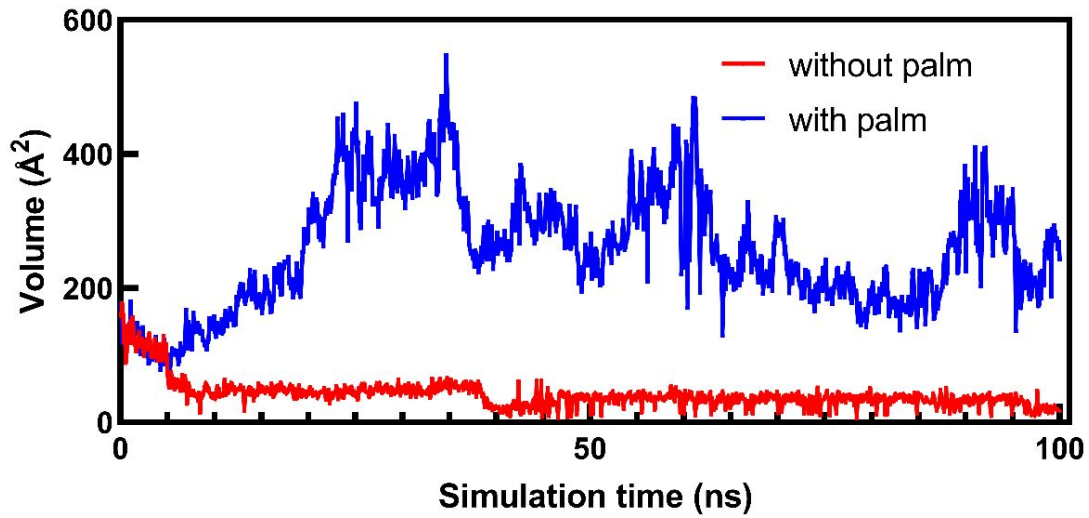

41

42 Figure S8: The volume of the E protein pentamer in the C-terminal part of TMD during the whole  
43 simulation

### Minimal radius of the pore on the middle part of TMD

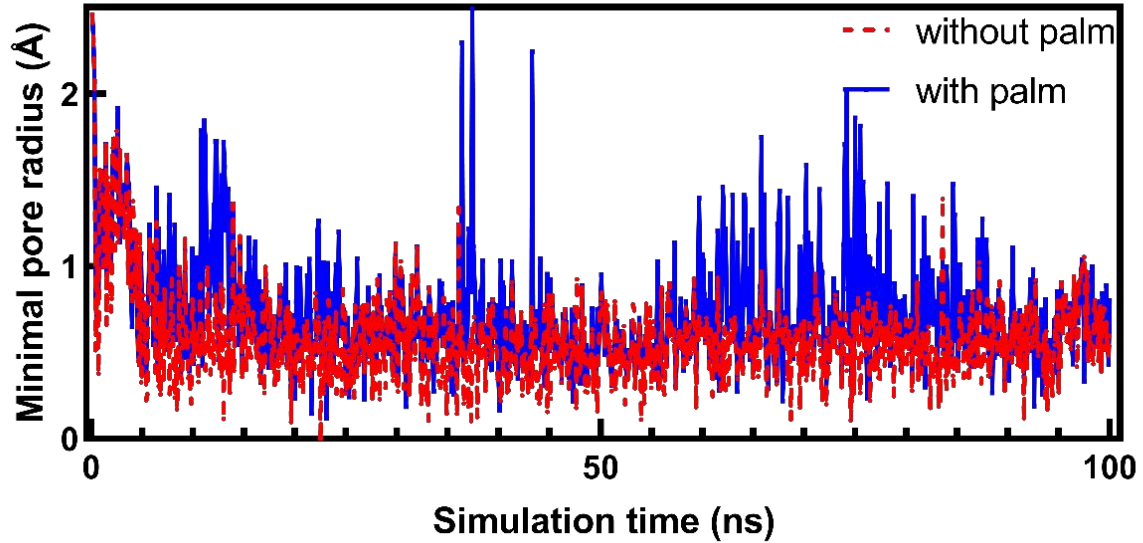

44

45 Figure S9: The minimal pore radius of the E-protein pentamer in the middle part (residue 21-30) of the  
46 TMD during the simulation.

47

48

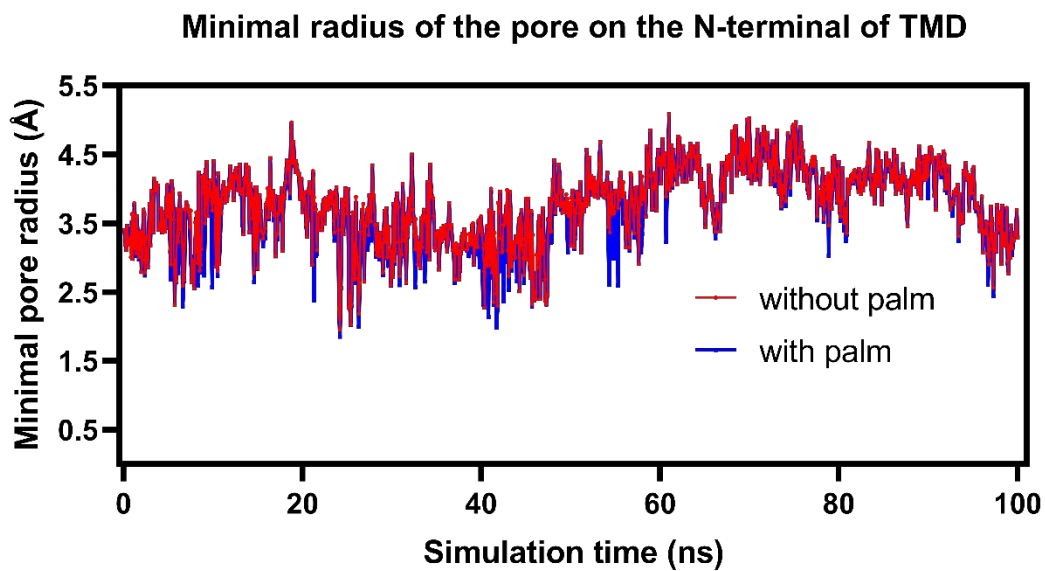

49  
 50 Figure S10: The minimal pore radius of the E-protein pentamer in the N-terminal (residue 10-20) during  
 51 the simulation.  
 52

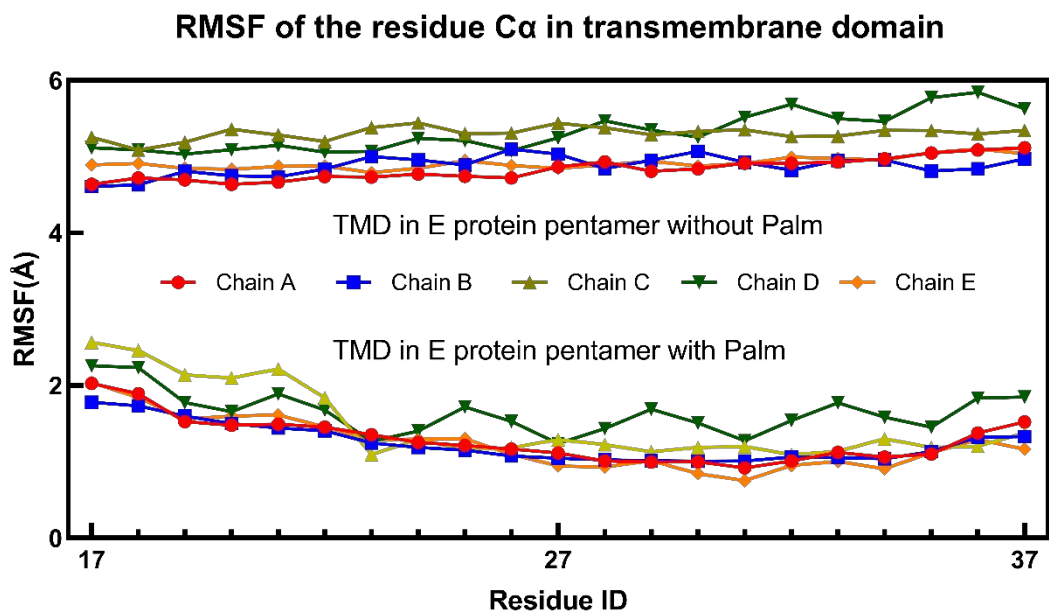

53  
 54 Figure S11: The RMSF of the residues (residues 17 to 37) in the transmembrane domain of E-protein  
 55 pentamer.

## Salt bridge ASP72-ARG61

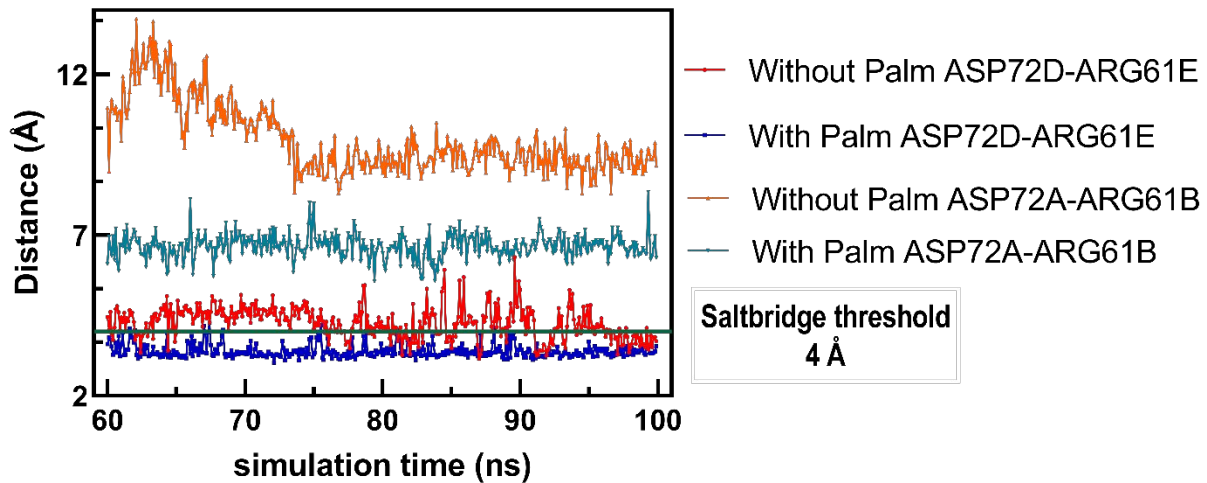

56

57 Figure S12: The distance of the salt bridges of ASP72D-ARG61E and ASP72A-ARG61B in both non-  
58 palmitoylated E protein pentamer and palmitoylated E protein pentamer. (Technically, ASP72A-ARG61B  
59 is not a salt bridge).

60

### A Principal component analysis of the TMD mass center in E protein pentamer without Palm

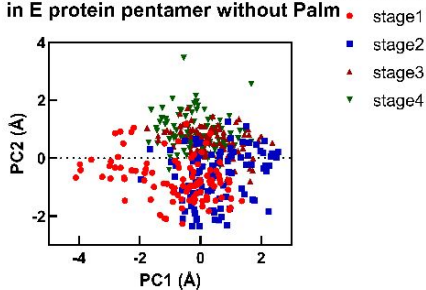

### B Principal component analysis of the TMD mass center in E protein pentamer with Palm

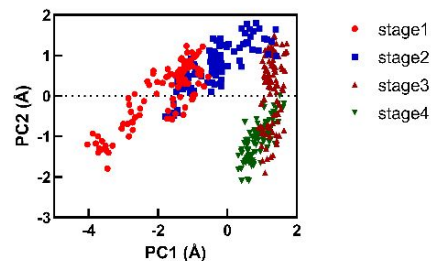

61

62 Figure S13: The PCA of the mass center of the transmembrane domain of E-protein pentamer with and  
63 without Palm. The stages 1, 2, 3, 4 represent the simulations between 0-25ns, 25-50ns, 50-75ns, 75-  
64 100ns.

65

66 Table S1: The rotation of the PCA for non-palmitoylated and palmitoylated E protein pentamer (Figure  
67 S13).

|   | PC1      | PC2      | PC3      |  | PC1      | PC2      | PC3      |
|---|----------|----------|----------|--|----------|----------|----------|
| X | 0.192947 | 0.979483 | 0.058182 |  | -0.67637 | 0.159331 | -0.71913 |
| Y | 0.697639 | -0.09525 | -0.71009 |  | 0.652164 | -0.32426 | -0.68523 |
| Z | 0.68998  | -0.1776  | 0.701702 |  | 0.342363 | 0.932453 | -0.11541 |

68

69



**A** Principal component analysis of the TMD mass center in E protein pentamer with Palm (Repeated simulation)

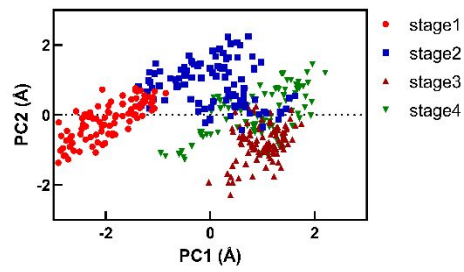

**B** Principal component analysis of the TMD mass center in E protein pentamer with Palm (Repeated simulation)

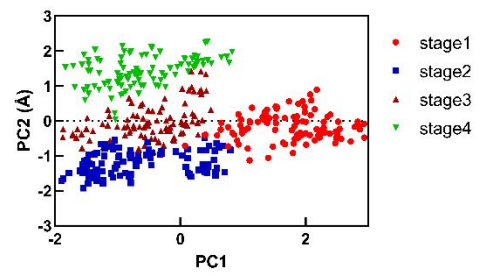

70

71 Figure S14: The PCA of the mass center of the transmembrane domain of E-protein pentamer with and  
72 without Palm in the repeated simulations. The stages 1, 2, 3, 4 represent the simulations between 0-25ns,  
73 25-50ns, 50-75ns, 75-100ns.
